# Supplementary material for: Socioeconomic Determinants and HIV Vulnerability in 12 Sub-Saharan African Countries: Insights from Population HIV Impact Surveys
Source: Research Square preprint supplement (doi:10.21203/rs.3.rs-7164310/v1), 2025-08-21
Supplement: Supplementary file 1 [file 462f5b43e15b603fa49adf67.docx]

**Diagnostic test**

The diagnostic test is chosen depending on the types of data used (i.e., cross-section, time series, or panel)(24). For this study, as a cross-sectional study with a binary response dependent variable (logistic regression), to have a precise result, the variable should satisfy the following assumptions according to (25–27). First, for binary logistics, the dependent variable must be binary, second, the observations must be independent of each other i.e. each observation must have one outcome, third, the independent variables are required to have little or no multicollinearity, fourth, the linearity of independent variables and log odds, and lastly, regression typically requires a large sample size. Table 1 below shows the linearity test, the independent test, the multicollinearity test, and the sample size test.

**Table 1:** **Diagnostic statistical test**

| **Variables** | **Binary test** | **Multicollinearity (1/VIF)** | **Linearity**  **test (P-Value)** | **Sample** |
| --- | --- | --- | --- | --- |
| HIV status | (0, 1) | N/A | N/A |  |
| Age group | (1,2,3,4,5) | 0.80 | 0.00** | 331,581 |
| Gender | (1,2) | 0.77 | N/A | 329,881 |
| Marital Status | (1,2) | 0.82 | N/A | 176,332 |
| Education Level | (1,2,3,4) | 0.74 | 0.011 | 245,201 |
| Individual Wealth | (1,2,3,4) | 0.63 | 0.49 | 347,320 |
| Stay of the Family | (1,2) | 0.96 | N/A | 134,707 |
| Number of Partners | (1,2,3) | 0.57 | N/A | 347,611 |
| Condom Use | (1,2,3) | 0.64 | N/A | 314,242 |
| Payment for Sex | (1,2) | 0.89 | N/A | 106,647 |
| Alcohol Status | (1,2,3,4,5) | 0.86 | 0.55 | 86,034 |
| Household Size | (1,2,3) | 0.96 | N/A | 347,611 |
| Residential | (1,2) | 0.78 | N/A | 322,195 |
| Food shortage | (1,2) | 0.84 | N/A | 224,271 |

** Significant level at 5% N/A- Not Applicable

The dependent variable is satisfied with the first assumption of the binary dependent variable as HIV status has (YES = 1 and NO= 0) outcomes. Secondly, each observation was found to be independent of the other (no repetition of outcome). Third, the independent variables were found to be free from multicollinearity, as in Table 1 above, the inverse of (1/VIF) for all independent variables was found to be greater than 0.5, as recommended by (28) and this makes the logistic regression analysis result have the right sign. Also, for the linearity issue, the study used the boxtid statistical test only for dependent variables with more than two categorical values, and the result found that Individual wealth and alcohol status are linearly related to HIV status, as the P-value is greater than 0.05, as recommended by (29). Lastly, regarding the issue of sample size, all variables were found to have a larger sample size to favor logistic regression. According to (30), robust standard error regression would address the issue of non-linearity to have the best linear unbiased estimates (BLUE).
